# Supplementary material for: Novel Biomarker Candidates for Febrile Neutropenia in Hematological Patients Using Nontargeted Metabolomics
Source: Hindawi journal article supplement (doi:10.1155/2018/6964529), 2018-01-01
Supplement: f1 [file 6964529.f1.pdf]

**Hilic pos**

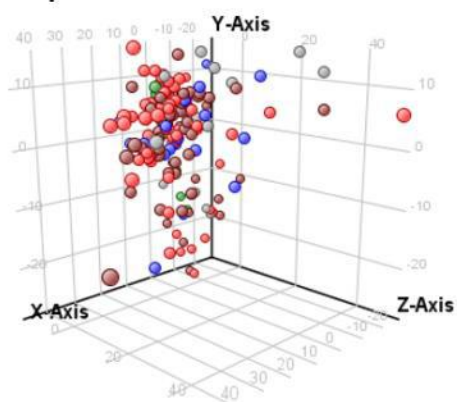

**Hilic neg**

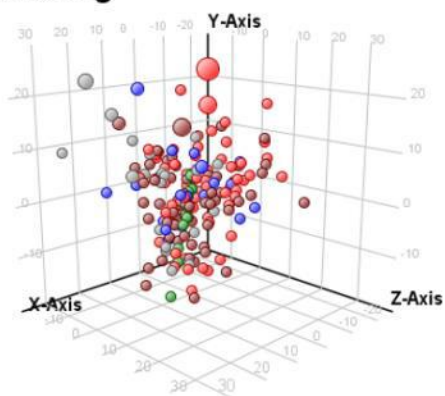

Color by Group

- QC
- Day 0\_No
- Day 1\_No
- Day 1\_Yes
- Day 0\_Yes

**RP pos**

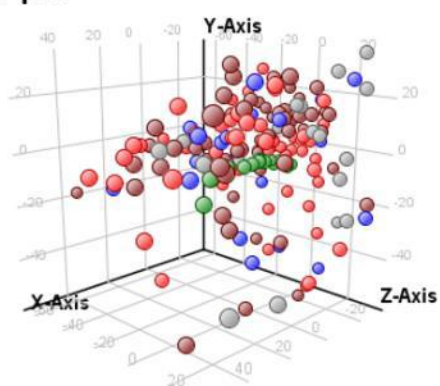

**RP neg**

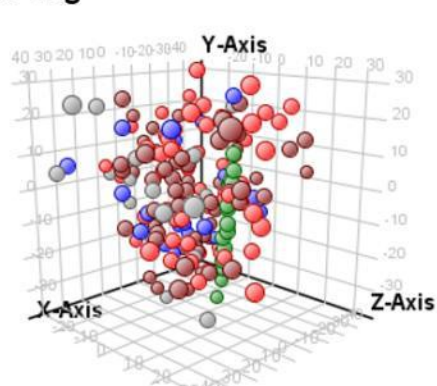

**Supplementary Figure.** Principal component analysis of the molecular features collected at four analytical modes of liquid chromatography - mass spectrometry analysis. Day 0 and Day 1 refer to the sampling date after the onset of febrile neutropenia and No/Yes refer to the development of complications during febrile neutropenia.
